# Supplementary material
Source: publisher figshare collection journal article supplement (https://tandf.figshare.com/ndownloader/files/14617139)
Supplement: Supplementary file 1 [file 14617139]

**Supplement Materials**

**Figure S1.** Sequencing map of four plasmids.

**
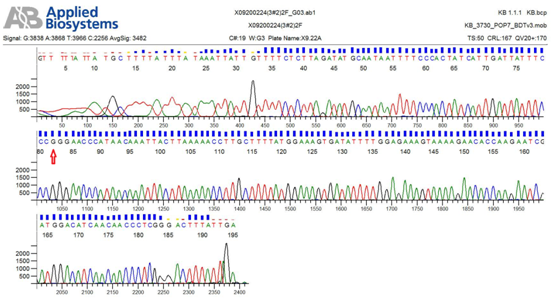
**

**The sequence map for** **Wild-type plasmid of *CYP2C19*2***

**
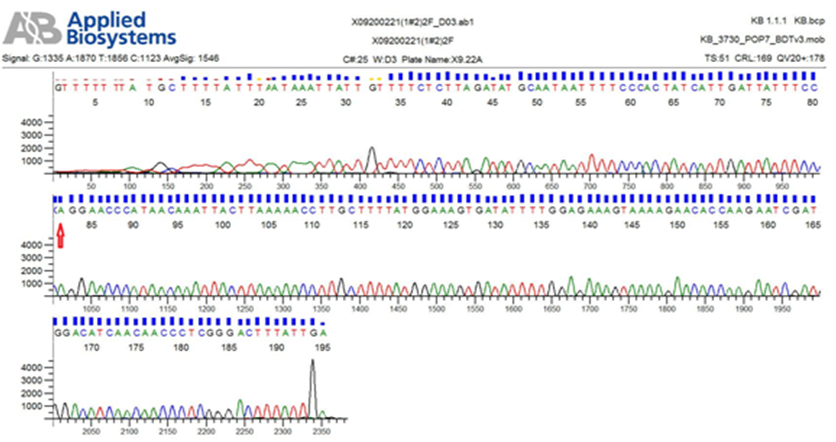
**

**The sequence map for** **mutant plasmid of *CYP2C19*2***

**
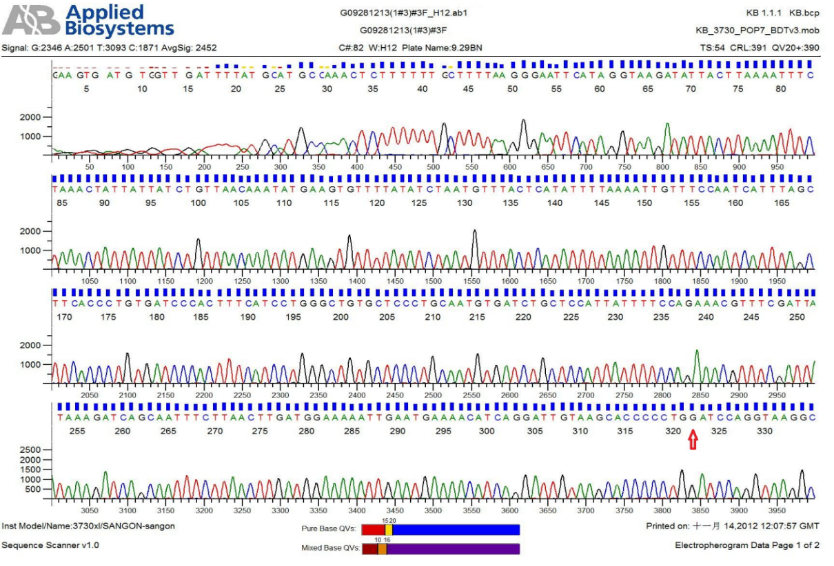
**

**The sequence map for** **Wild-type plasmid of *CYP2C19*3***

**
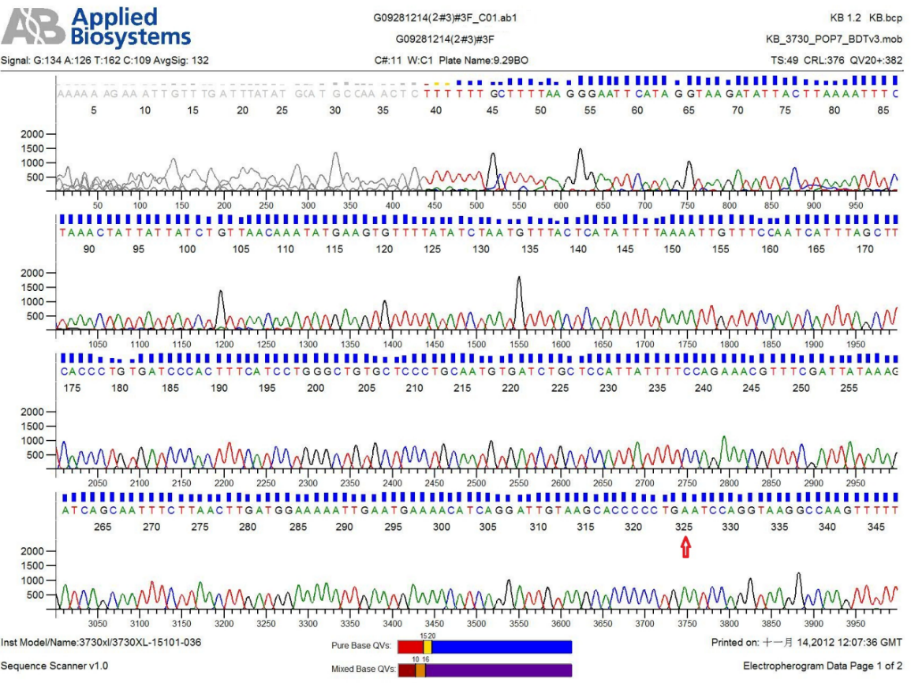
**

**The sequence map for** **mutant plasmid of *CYP2C19*3***

**Figure S2.** The magnetic signals by magnetic reader.

**
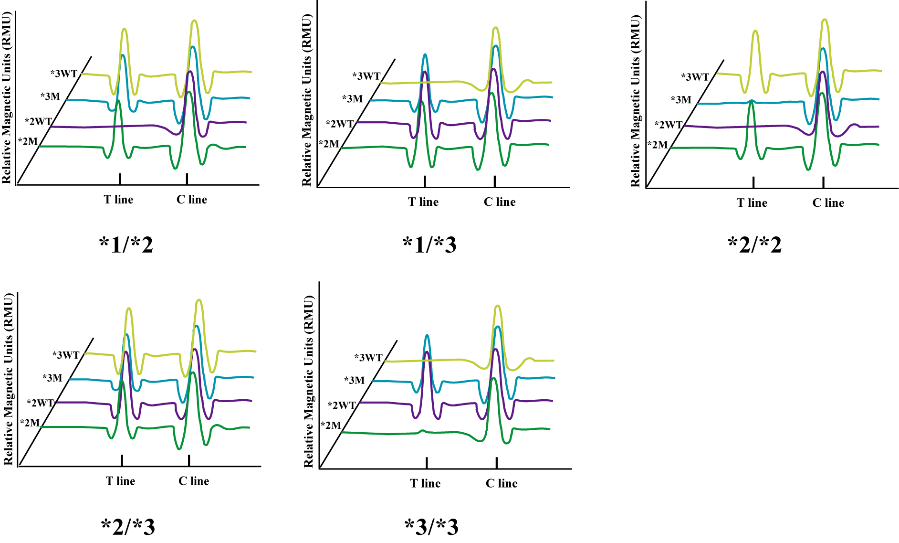
**

**Figure S3.** Screening of specific primers.

**
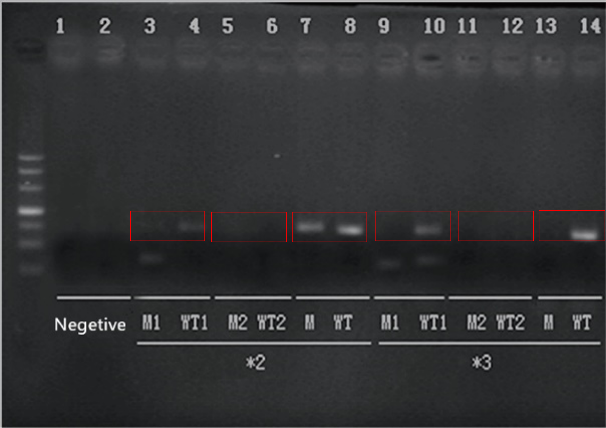
**

**Figure S4.** The brightness of T line at different primer concentrations.

**
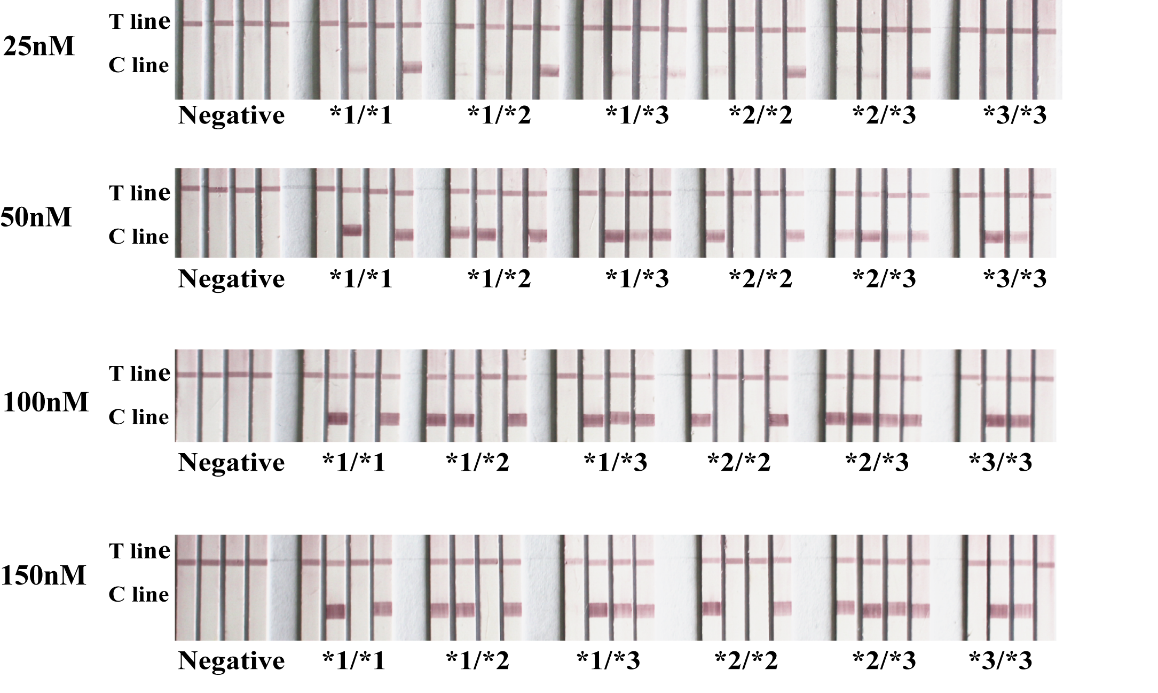
**

**
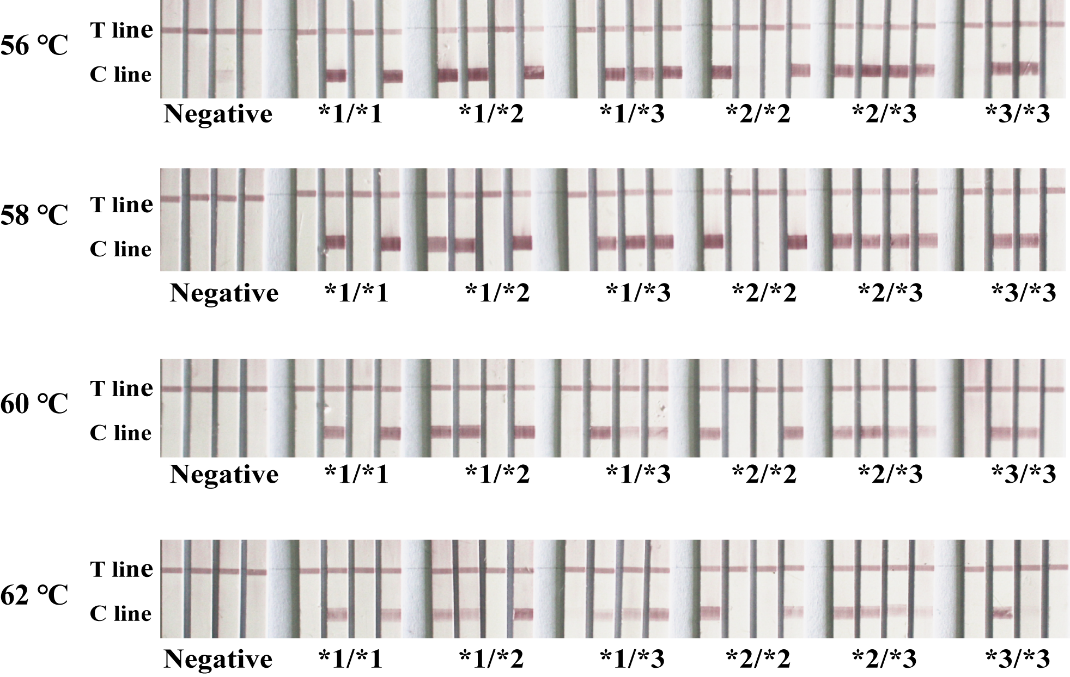
****Figure S5.** The brightness of T line at different annealing temperatures.

**Figure S6.** The brightness of T line at different cycle numbers.

**
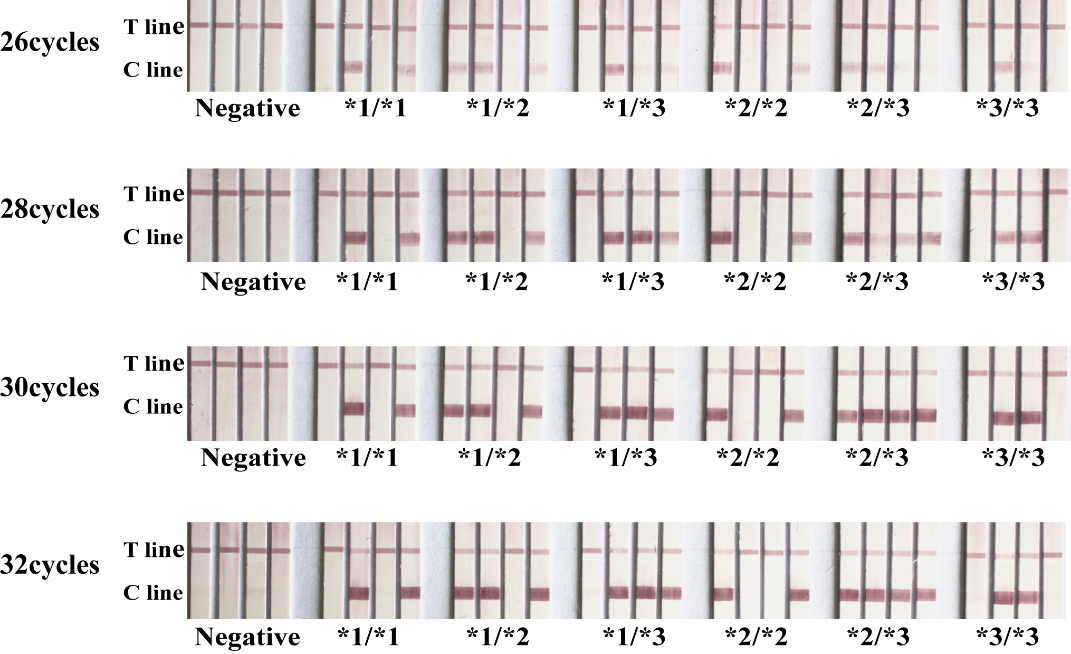
**

**Figure S7.** The genotyping results of ARMS-LFA system with three batches of strips.

**
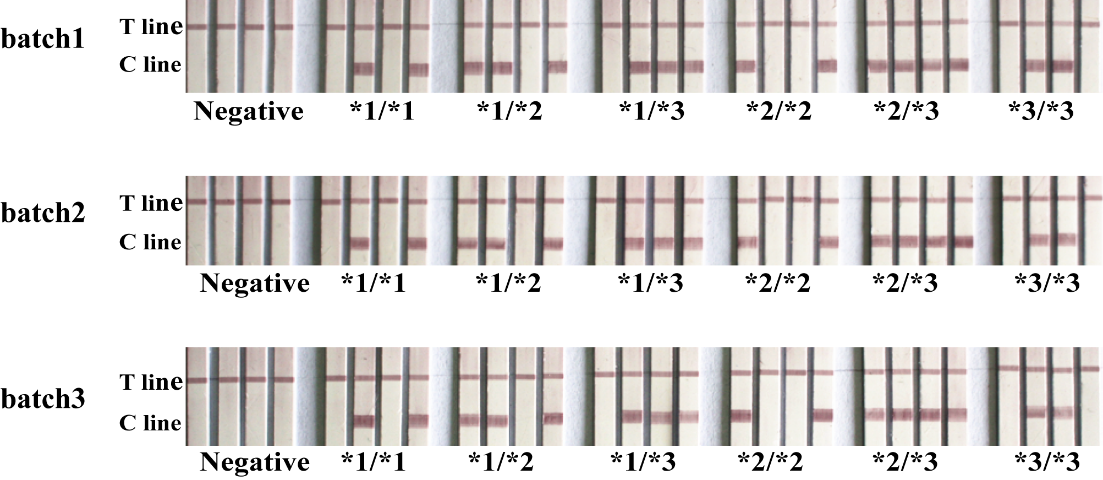
**
